# Supplementary material for: A Global Perspective of the Genetic Basis for Carbonyl Stress Resistance
Source: PubMed Central journal article supplement (PMC3276133; doi:10.1534/g3.111.000505), 2011-08-01
Supplement: supp_1.3.219_FigureS1.pdf [file supp_1.3.219_FigureS1.pdf]

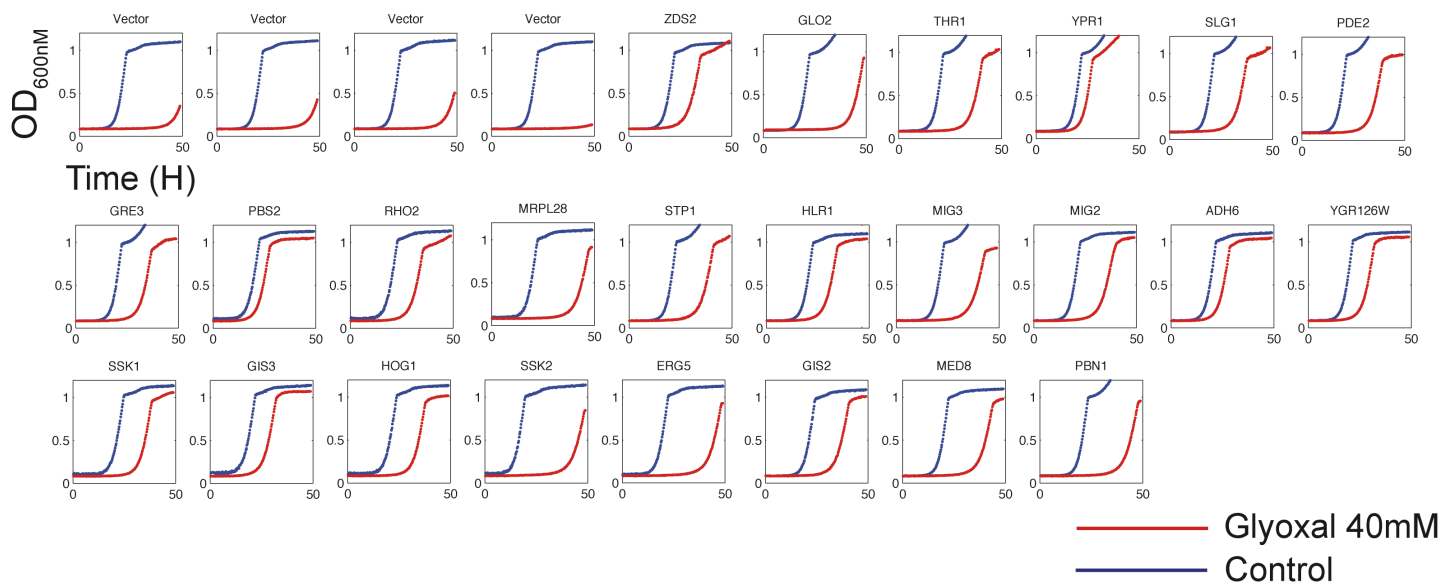

**Figure S1** Confirmation growth curves of multicopy suppressors identified from MSP screen with glyoxal and/or isonicotinamide. Singly cloned ORFs under the control of native promoters on 2 $\mu$  plasmids were grown in Leu-synthetic media in the presence or absence of glyoxal.
