# Supplementary material for: A Global Perspective of the Genetic Basis for Carbonyl Stress Resistance
Source: PubMed Central journal article supplement (PMC3276133; doi:10.1534/g3.111.000505), 2011-08-01
Supplement: supp_1.3.219_FigureS2.pdf [file supp_1.3.219_FigureS2.pdf]

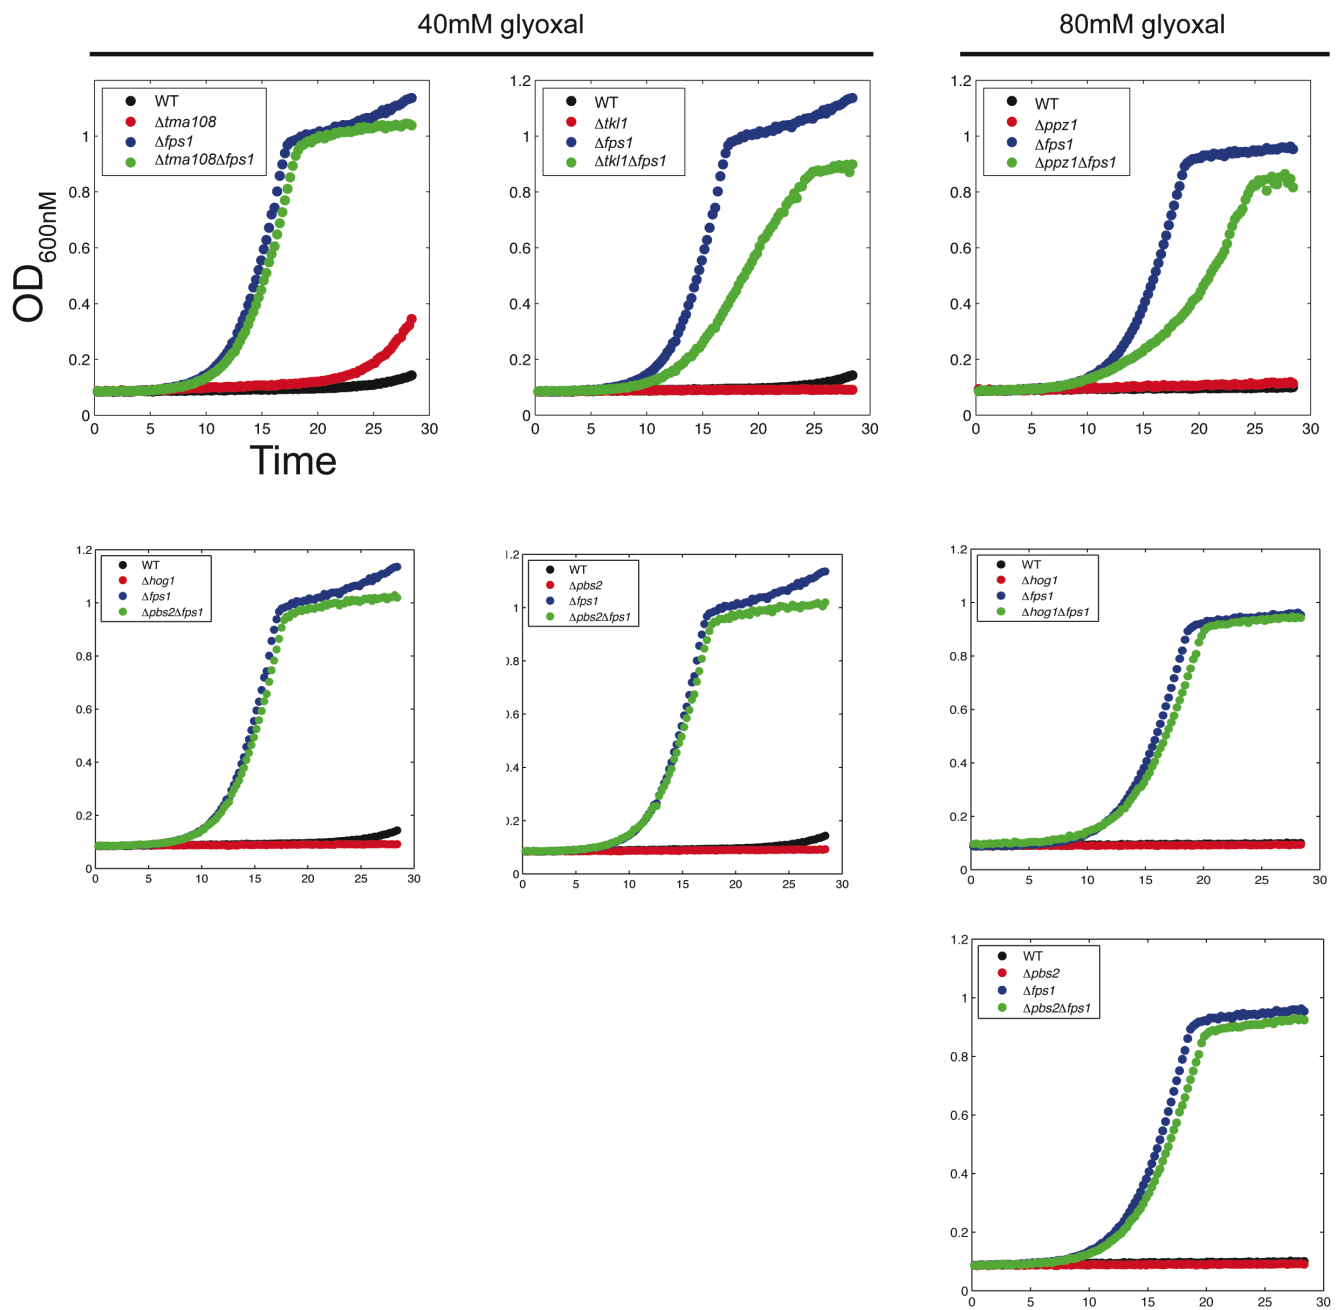

**Figure S2** Loss of *Δfps1* suppresses glyoxal sensitivity of *Atma108*, *Δtkl1*, *Δpzs1*, *Δpbs2*, *Δhog1* mutants at higher glyoxal concentrations.
