# Supplementary material for: A Global Perspective of the Genetic Basis for Carbonyl Stress Resistance
Source: PubMed Central journal article supplement (PMC3276133; doi:10.1534/g3.111.000505), 2011-08-01
Supplement: supp_1.3.219_TableS5.pdf [file supp_1.3.219_TableS5.pdf]

**Table S5 Plasmids used in this study**

| <b>Plasmids</b>       | <b>Characteristics</b>                                                             | <b>Source</b> |
|-----------------------|------------------------------------------------------------------------------------|---------------|
| P5476                 | High copy number <i>LEU2</i> marker                                                | Charlie Boone |
| P5476- <i>ZDS2</i>    | High copy number <i>LEU2</i> marker,<br><i>ZDS2</i> -ORF plus regulatory regions   | Charlie Boone |
| P5476- <i>GLO2</i>    | High copy number <i>LEU2</i> marker<br><i>GLO2</i> -ORF plus regulatory regions    | Charlie Boone |
| P5476- <i>THR1</i>    | High copy number <i>LEU2</i> marker<br><i>THR1</i> -ORF plus regulatory regions    | Charlie Boone |
| P5476- <i>YPR1</i>    | High copy number <i>LEU2</i> marker<br><i>YPR1</i> -ORF plus regulatory regions    | Charlie Boone |
| P5476- <i>SLG1</i>    | High copy number <i>LEU2</i> marker<br><i>SLG1</i> -ORF plus regulatory regions    | Charlie Boone |
| P5476- <i>PDE2</i>    | High copy number <i>LEU2</i> marker<br><i>PDE2</i> -ORF plus regulatory regions    | Charlie Boone |
| P5476- <i>GRE3</i>    | High copy number <i>LEU2</i> marker<br><i>GRE3</i> -ORF plus regulatory regions    | Charlie Boone |
| P5476- <i>PBS2</i>    | High copy number <i>LEU2</i> marker<br><i>PBS2</i> -ORF plus regulatory regions    | Charlie Boone |
| P5476- <i>RHO2</i>    | High copy number <i>LEU2</i> marker<br><i>RHO2</i> -ORF plus regulatory regions    | Charlie Boone |
| P5476- <i>MRPL28</i>  | High copy number <i>LEU2</i> marker<br><i>MRPL28</i> -ORF plus regulatory regions  | Charlie Boone |
| P5476- <i>STP1</i>    | High copy number <i>LEU2</i> marker<br><i>STP1</i> -ORF plus regulatory regions    | Charlie Boone |
| P5476- <i>HLR1</i>    | High copy number <i>LEU2</i> marker<br><i>HLR1</i> -ORF plus regulatory regions    | Charlie Boone |
| P5476- <i>MIG3</i>    | High copy number <i>LEU2</i> marker<br><i>MIG3</i> -ORF plus regulatory regions    | Charlie Boone |
| P5476- <i>MIG2</i>    | High copy number <i>LEU2</i> marker<br><i>MIG2</i> -ORF plus regulatory regions    | Charlie Boone |
| P5476- <i>ADH6</i>    | High copy number <i>LEU2</i> marker<br><i>ADH6</i> -ORF plus regulatory regions    | Charlie Boone |
| P5476- <i>YGR126W</i> | High copy number <i>LEU2</i> marker<br><i>YGR126W</i> -ORF plus regulatory regions | Charlie Boone |
| P5476- <i>SSK1</i>    | High copy number <i>LEU2</i> marker<br><i>SSK1</i> -ORF plus regulatory regions    | Charlie Boone |
| P5476- <i>GIS3</i>    | High copy number <i>LEU2</i> marker<br><i>GIS3</i> -ORF plus regulatory regions    | Charlie Boone |
| P5476- <i>HOG1</i>    | High copy number <i>LEU2</i> marker<br><i>HOG1</i> -ORF plus regulatory regions    | Charlie Boone |
| P5476- <i>SSK2</i>    | High copy number <i>LEU2</i> marker<br><i>SSK2</i> -ORF plus regulatory regions    | Charlie Boone |
| P5476- <i>ERG5</i>    | High copy number <i>LEU2</i> marker<br><i>ERG5</i> -ORF plus regulatory regions    | Charlie Boone |
| P5476- <i>GIS2</i>    | High copy number <i>LEU2</i> marker<br><i>GIS2</i> -ORF plus regulatory regions    | Charlie Boone |
| P5476- <i>MED8</i>    | High copy number <i>LEU2</i> marker<br><i>MED8</i> -ORF plus regulatory regions    | Charlie Boone |
| P5476- <i>PBN1</i>    | High copy number <i>LEU2</i> marker<br><i>PBN1</i> -ORF plus regulatory regions    | Charlie Boone |
| pRS426- <i>GLO1</i>   | High copy number <i>URA3</i> marker<br><i>GLO1</i> -ORF plus regulatory regions    | This study    |
| pUG23- <i>FPS1GFP</i> | Low copy number <i>HIS3</i> marker<br><i>FPS1</i> -ORF driven by Met25 promoter    | This study    |
